# Supplementary material for: Pillar[5]arene based water-soluble [3]pseudorotaxane with enhanced fluorescence emission for cell imaging and both type I and II photodynamic cancer therapy
Source: Royal Society of Chemistry journal article supplement (doi:10.1039/d3cc01929b), 2023-01-01
Supplement: d3cc01929b1.pdf [file d3cc01929b1.pdf]

# Pillar[5]arene based water-soluble [3]pseudorotaxane with enhanced fluorescence emission for cell imaging and both type I & II photodynamic cancer therapy

Yue Zhang,<sup>1</sup> Yang Wang,<sup>1,\*</sup> Tingting Chen,<sup>1</sup> Ying Han,<sup>2,\*</sup> Chaoguo Yan,<sup>2</sup> Yan Cai,<sup>1</sup> Bing Lu,<sup>1</sup>  
Longtao Ma,<sup>1,2,\*</sup>, Yue Ding,<sup>1</sup> and Yong Yao<sup>1,\*</sup>

<sup>1</sup>School of Chemistry and Chemical Engineering, Nantong University, Nantong, Jiangsu, 226019, P.R. China.

<sup>2</sup>School of Chemistry and Chemical Engineering, Yangzhou University, Yangzhou, Jiangsu, 225001, P.R. China.

E-mail: ywang85@ntu.edu.cn; hanying@yzu.edu.cn; MZ120200718@yzu.edu.cn; yaoyong1986@ntu.edu.cn.

## Supporting Information

|   |                                                              |     |
|---|--------------------------------------------------------------|-----|
| 1 | Materials and methods                                        | S2  |
| 2 | Synthesis of <i>para</i> -modified porphyrin ( <b>pPor</b> ) | S4  |
| 3 | Synthesis of <b>WP5</b>                                      | S7  |
| 4 | Host-guest interaction between <b>WP5</b> and <b>pPor</b>    | S8  |
| 5 | ROS generation ability                                       | S10 |
| 6 | Cell imaging                                                 | S10 |

## 1. Materials and methods

### Materials

All reagents were commercially available and used as supplied without further purification. Solvents were either employed as purchased or dried according to procedures described in the literature.

### Measurements

**NMR spectroscopy.**  $^1\text{H}$  and  $^{13}\text{C}$  NMR spectra were recorded on a Bruker AV400 spectrometer.

**Fluorescence spectroscopy.** Steady-state fluorescence spectra were recorded in a conventional quartz cell (light path 10 mm) on a Varian Cary Eclipse equipped with a Varian Cary single-cell peltier accessory to control temperature. For [3]WP5PR,  $\lambda_{\text{ex}} = 380$  nm and  $\lambda_{\text{em}} = 465$  nm.

**UV/Vis spectroscopy.** UV/Vis spectra and the optical transmittance were recorded in a quartz cell (light path 10 mm) on a Shimadzu UV-3600 spectrophotometer equipped with a PTC-348WI temperature controller.

**ESI-MS spectroscopy.** Electrospray ionization mass spectra (ESI-MS) were measured by Agilent 6520 Q-TOF-MS.

**Cytotoxicity experiments.** HeLa cells were incubated in Dulbecco's modified Eagle's medium (DMEM). The medium was supplemented with 10% fetal bovine serum and 1% Penicillin-Streptomycin. Cells were seeded in 96-well plates ( $5 \times 10^4$  cell  $\text{mL}^{-1}$ , 0.1 mL per well) for 4 h at 37°C in 5%  $\text{CO}_2$ . Then the cells were incubated with different groups for 4 h. The relative cellular viability was determined by the MTT assay.

**Confocal laser scanning microscopy.** Cells were seeded in 6-well plates ( $5 \times 10^4$  cell  $\text{mL}^{-1}$ , 2 mL per well) for 24 h at 37°C in 5%  $\text{CO}_2$ . The cells were incubated with the corresponding solution for 4 h. Then the medium was removed, and the cells were washed with phosphate buffer solution for three time. Finally, the cells were subjected

to observation by a confocal laser scanning microscope. The mean fluorescence intensity was analysis by image J.

**TEM microscopy.** High-resolution Transmission electron microscopy (TEM) images were acquired using a Tecnai 20 high-resolution transmission electron microscope operating at an accelerating voltage of 200 keV. The sample for high-resolution TEM measurements was prepared by dropping the solution onto a copper grid. The grid was then air-dried.

**DLS spectroscopy.** Solution samples were examined on a laser light scattering spectrometer (BI-200SM) equipped with a digital correlator (TurboCorr) at 636 nm at a scattering angle of 90°. The hydrodynamic diameter (Dh) was determined by DLS experiments at 25°C.

**ROS detection.** HeLa cells were seeded into 12 mm sterile coverslips in a 6-well plate and maintained for 12 h. The cells were incubated with WP5, pPor, and [3]WP5PR for 4h, then irradiated with 660 nm (1 mM/cm<sup>2</sup>) laser for 10 min. Afterward, DCFH-DA/SOSG/APF was added to incubate together with cells and imaged, respectively.

**Live-Dead Cell Staining.** The same density of HeLa cells ( $3 \times 10^5$  cell mL<sup>-1</sup>) were distributed into three confocal dishes (35 mm) for 12 h. Then the 2-plate cells were cultured with new DMEM containing [3]WP5PR NPs (70 μM). After 5 h, the cells were subjected to dark or laser irradiation (660 nm, 1.0 mW/cm<sup>2</sup>, 10 min). After 48 h, the cells were stained with a calcein AM/propidium iodide mixture for 30 min and washed twice using PBS. The fluorescence images were eventually acquired via a confocal laser scanning microscope.

**Flow cytometric analysis.** Flow cytometric analysis was performed to detect the cell death. HeLa cells were seeded in a 6-well plate and maintained for 24 h. Then the cells were incubated with PBS, WP5, pPor, [3]WP5PR and the irradiated with 660 nm laser for 10 min, respectively, for 4 h at 37 °C. After that, the cells were washed several times with PBS and analyzed by flow cytometry.

## 2. Synthesis of *para*-modified porphyrin (*pPor*)

Scheme S1. Synthetic route to *pPor*.

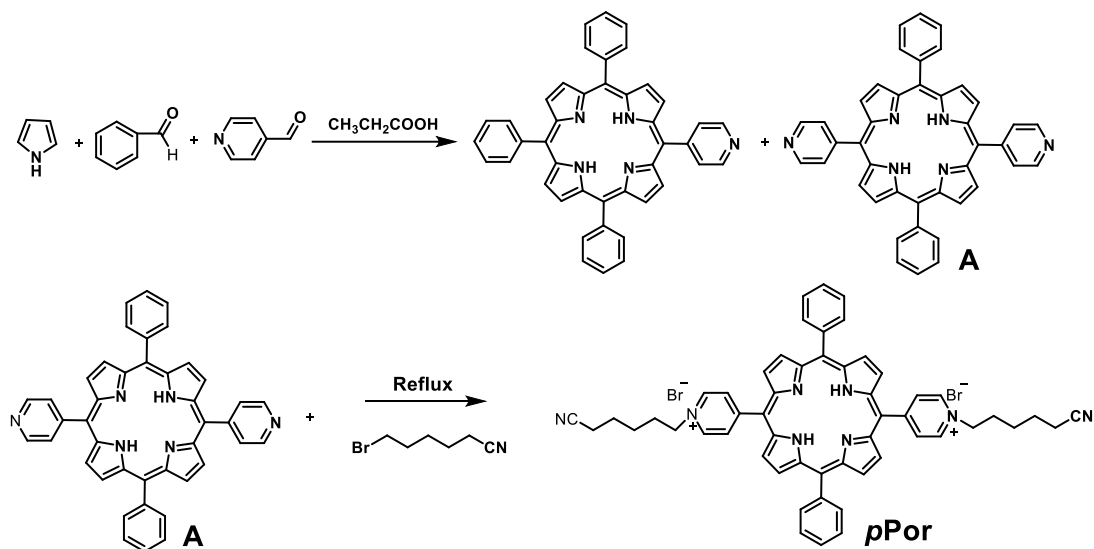

In order to synthesize *pPor*, porphyrin **A** was prepared according to previous report firstly.<sup>S1</sup>

Under N<sub>2</sub> atmosphere, 0.4 mmol (0.246g) porphyrin **A** was added into a 50 mL round-bottled flask, dissolved in 25 mL DMF solution, and refluxed at 115°C. Then 1.2 mmol (0.212g) 6-bromocapronitrile was added into the reaction solution for 24 hours. At the end of the reaction, the solid was precipitated in methanol solution, and finally the product *pPor* was obtained through filtration as a purple solid.

**pPor**: yield, 60%, m.p.262-264°C; <sup>1</sup>H NMR (400 MHz, CD<sub>3</sub>OD) δ 9.43 (d, *J* = 6.5 Hz, 6H, ArH), 8.92 (d, *J* = 6.6 Hz, 8H, CH), 8.14 (d, *J* = 6.7 Hz, 4H, ArH), 7.84 (t, *J* = 7.5 Hz, 3H, ArH), 7.77 (t, *J* = 7.3 Hz, 5H, ArH), 5.02 (d, *J* = 7.6 Hz, 4H, CH<sub>2</sub>), 2.64 (d, *J* = 7.0 Hz, 4H, CH<sub>2</sub>), 2.42 (t, *J* = 7.6 Hz, 4H, CH<sub>2</sub>), 1.94 – 1.90 (m, 4H, CH<sub>2</sub>), 1.83 (m, 4H, CH<sub>2</sub>); <sup>13</sup>C NMR (100 MHz, CD<sub>3</sub>OD) δ 143.0, 134.2, 133.0, 126.7, 48.26, 48.08, 48.04, 47.89, 47.83, 47.63, 47.62, 47.40, 47.37, 47.19, 47.13, 46.98; MS (*m/z*): HRMS (ESI) Calcd. for C<sub>54</sub>H<sub>48</sub>N<sub>8</sub>[*M* - 2Br]<sup>2+</sup>: 404.1995, found: 404.1993.

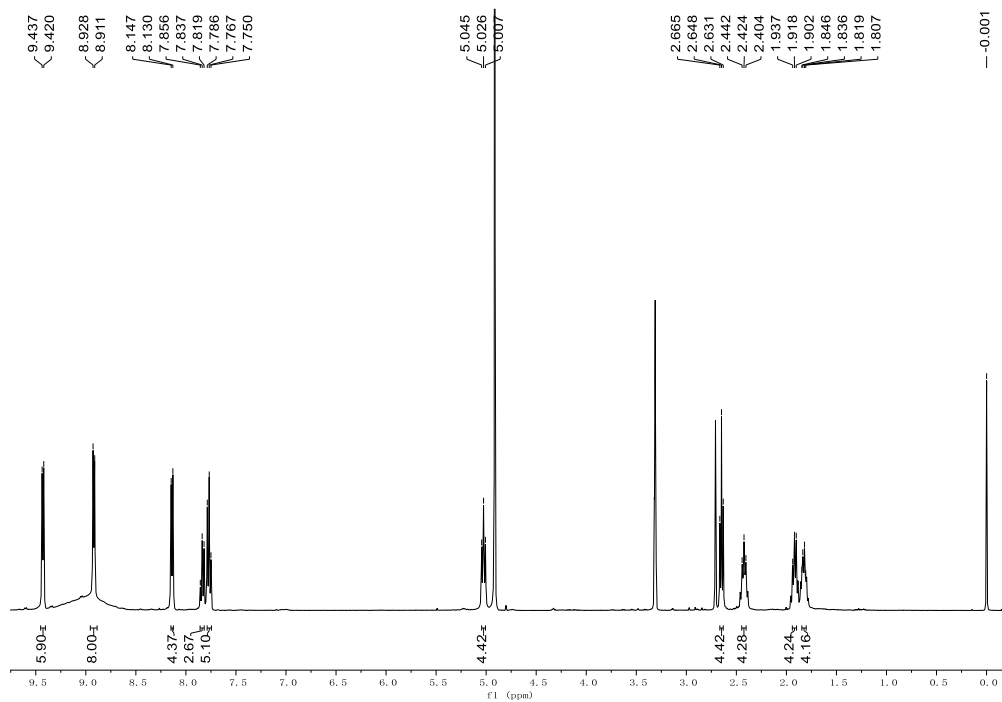

Figure S1. <sup>1</sup>H NMR (400 MHz, 298K, CD<sub>3</sub>OD) spectrum of *pPor*.

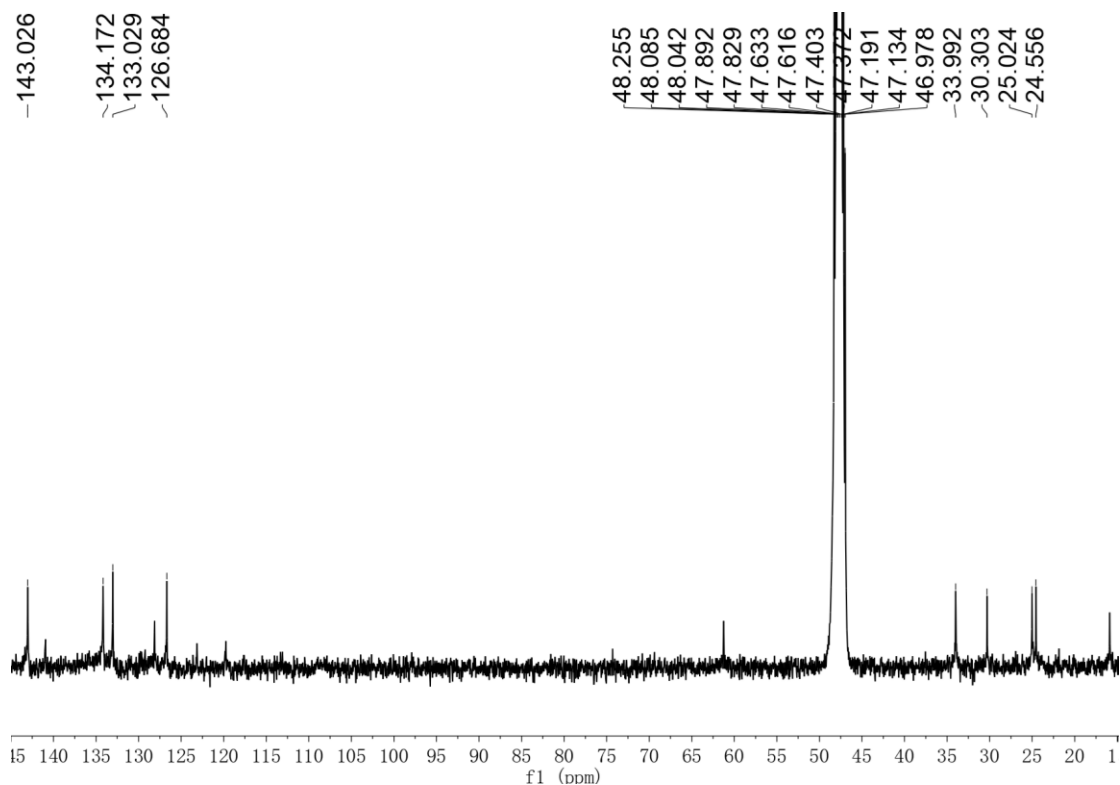

Figure S2. <sup>13</sup>C NMR (100 MHz, 298K, CD<sub>3</sub>OD) spectrum of *pPor*.

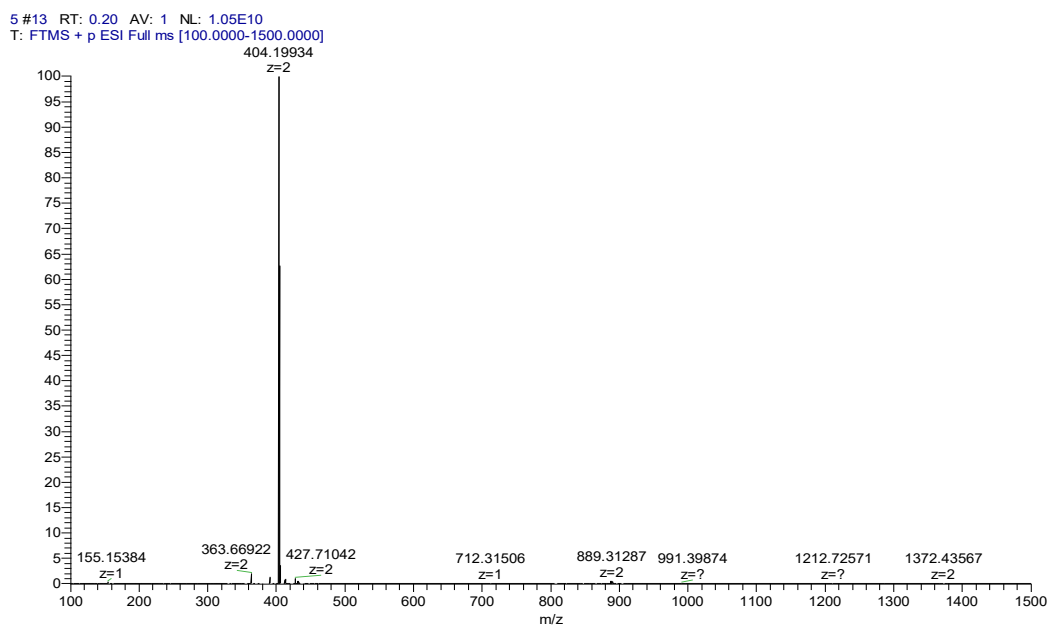

Figure S3. HR-MS (ESI) of *pPor*. Calcd. for  $C_{54}H_{48}N_8([M - 2Br]^{2+})$ : 404.1995, found: 404.1993.

### 3. Synthesis of **WP5**<sup>S2</sup>

**WP5** was prepared according to previous report,<sup>S2</sup> and the <sup>1</sup>H NMR was showed in Figure S4.

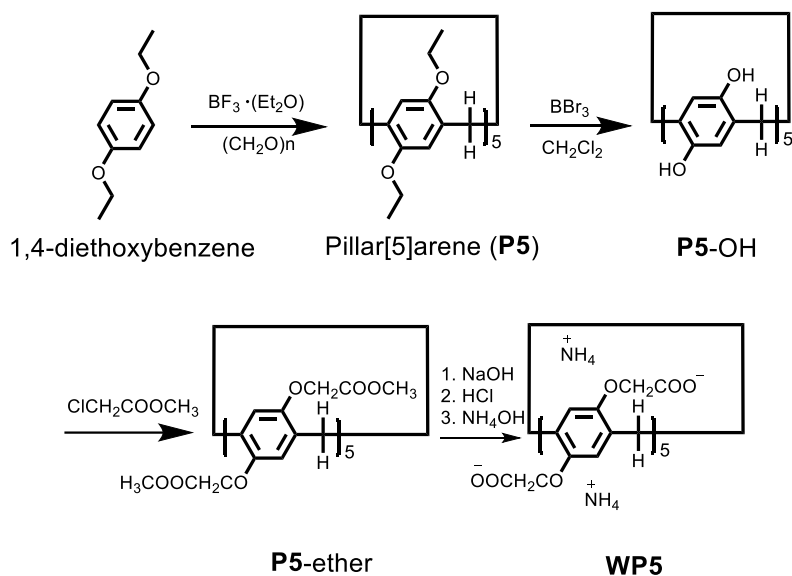

Scheme S2. Synthesis of water soluble pillar[5]arene (**WP5**).

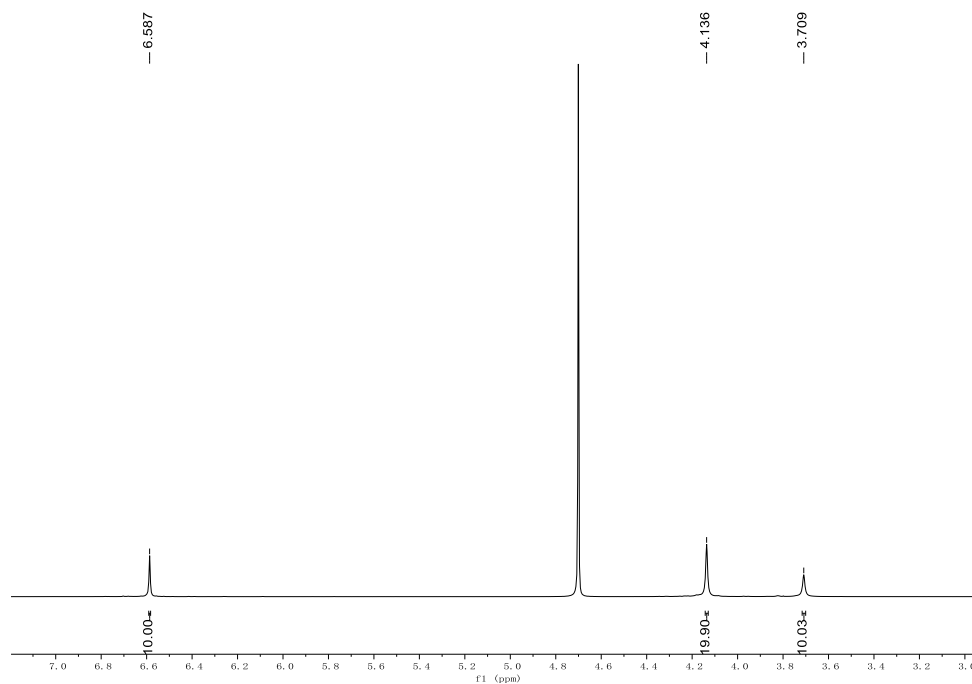

Figure S4. <sup>1</sup>H NMR (400 MHz, 298K, D<sub>2</sub>O) spectrum of **WP5**.

#### 4. Host-guest interaction between **WP5** and **pPor**

To determine the stoichiometry and association constant between **WP5** and **pPor**, Fluorescence titrations were done with solutions which had a constant concentration of **pPor** (10  $\mu\text{M}$ ) and varying concentrations of **WP5**. By a Stern-Volmer curves, the association constant between the **pPor** and **WP5** was calculated. By a mole ratio plot, a 2:1 stoichiometry was obtained; **WP5** was shown to form a 2:1 complex with **pPor**.

Subsequently, the formation of **[3]WP5PR** was investigated by 2D Nuclear Overhauser Effect Spectroscopy (NOESY). As shown in Fig. S5 (30.0 mM **WP5** and 15.0 mM **pPor** in  $\text{D}_2\text{O}/\text{CD}_3\text{OD}$ ), correlations were observed between protons  $\text{H}_{\alpha\text{-py}}$  of **pPor** and protons  $\text{H}_{\text{bridge}}$  on **WP5**, suggesting that pyridinium groups were threaded into the cavity of **WP5**. Therefore, it was confirmed that when **pPor** encountered **WP5**, the alkyl chain of **pPor** penetrated through the cavity of **WP5**. The formation of **[3]WP5PR** was mainly driven by multiple electrostatic interactions between the carboxylate anions on **WP5** and the cationic pyridiniums on **pPor**, hydrophobic interactions, and  $\pi\text{-}\pi$  stacking interactions.

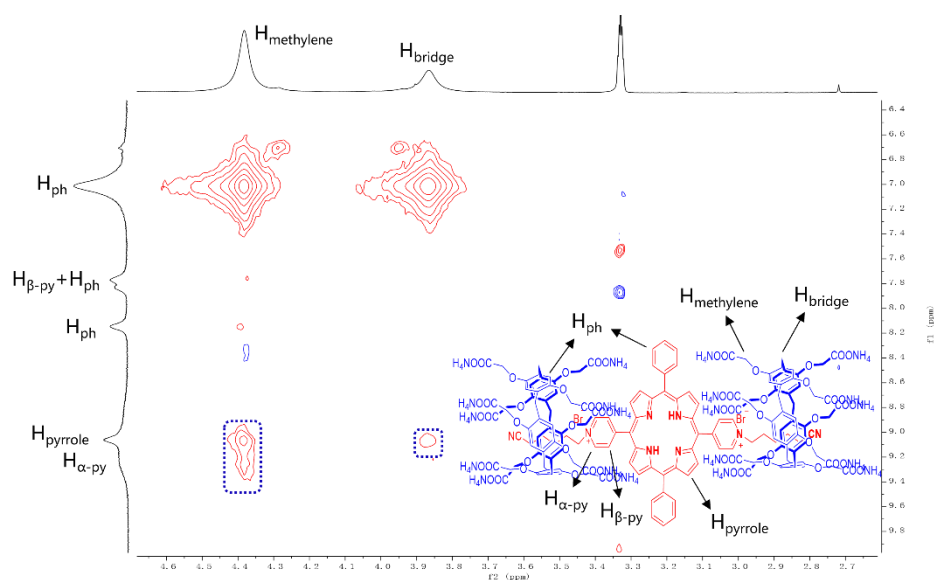

Figure S5. Partial 2D NOESY spectrum of **WP5** and **pPor** in  $\text{CD}_3\text{OD} + \text{D}_2\text{O}$  at 298K.



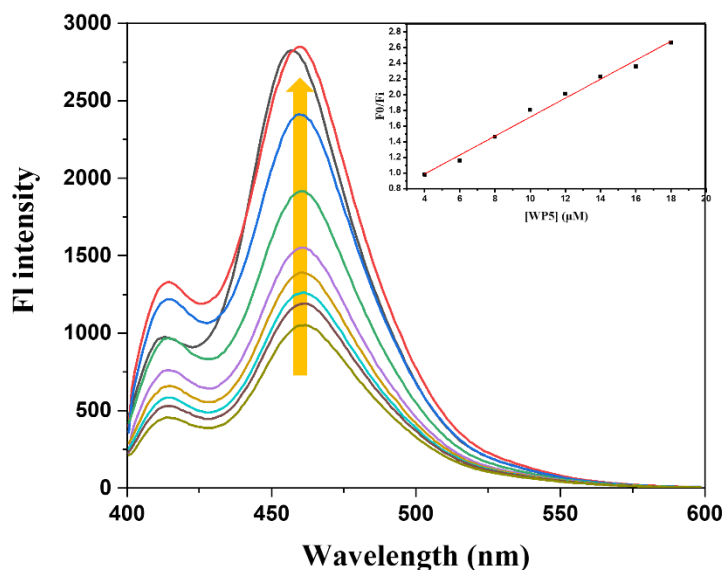

Figure S6. Fluorescence spectra of *pPor* in the presence of **WP5** ( $\lambda_{\text{ex}} = 380 \text{ nm}$ ). The inset was the Stern-Volmer curves for the  $(\text{WP5})_2 \supset \text{pPor}$  interaction ( $K = (1.21 \pm 0.049) \times 10^4 \text{ M}^{-1}$ ,  $R^2 = 0.9902$ ).  $C(\text{pPor}) = 10 \text{ } \mu\text{M}$ . **WP5** concentrations were 0, 4, 6, 8, 10, 12, 14, 16, 18  $\mu\text{M}$ , respectively.

As shown in Fig. S6, the fluorescence of *pPor* was enhanced with the gradual addition of **WP5** and the association constant ( $K$ ) was calculated to be  $(1.21 \pm 0.049) \times 10^4 \text{ M}^{-1}$ .

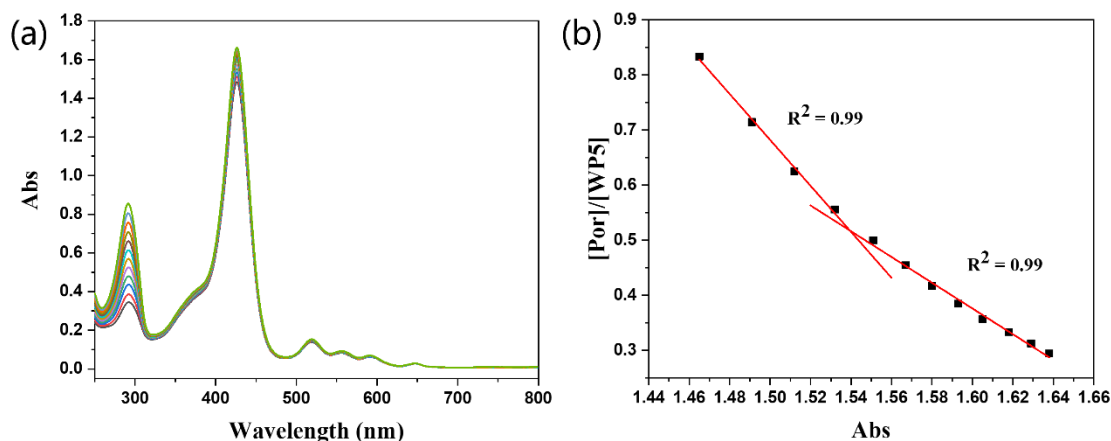

Figure S7. (a) UV titration of *pPor* in methanol solution with increasing **WP5** concentration. (b) Plot the work of the  $(\text{WP5})_2 \supset \text{pPor}$  complex by plotting the UV absorbance at 424 nm. Working diagram of composite  $(\text{WP5})_2 \supset \text{pPor}$  showing a stoichiometric ratio of 2:1 between **WP5** and *pPor*.

The mole ratio plot based on the UV titration experiments indicated that **WP5** and *pPor* had a 2 : 1 stoichiometry in  $[\text{3}]\text{WP5PR}$  (Fig. S7, ESI†). Therefore, according to the above experiments, we can confirm that  $[\text{3}]\text{WP5PR}$  is automatically formed when *pPor* and **WP5** were mixed in water.

## 5. ROS generation ability

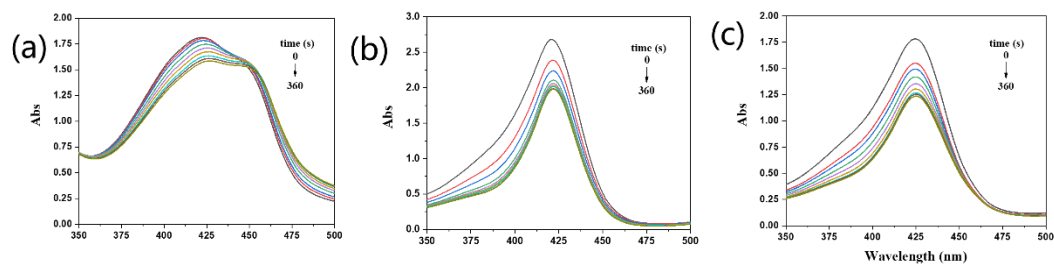

Figure S8. Time-dependent UV-vis spectra of (a) DPBF and (b) with *pPor* (c) with [3]WP5PR after irradiation with 660 nm light ( $1 \text{ mW cm}^{-2}$ ) in aqueous solution.

## 6. Cell imaging

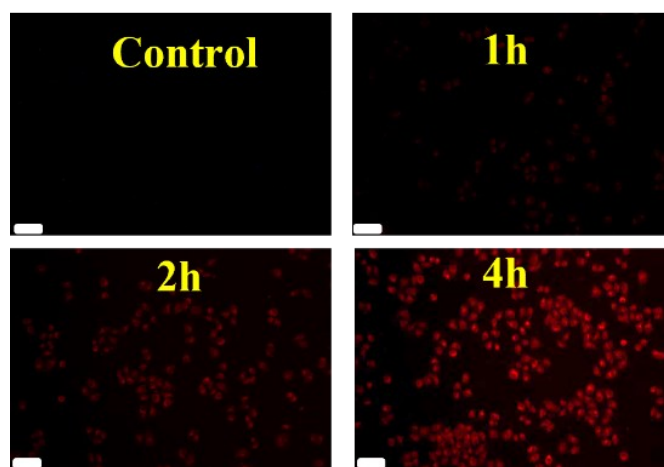

Figure S9. CLSM images of HeLa cells incubated [3]WP5PR for 0h, 1h, 2h and 4h.

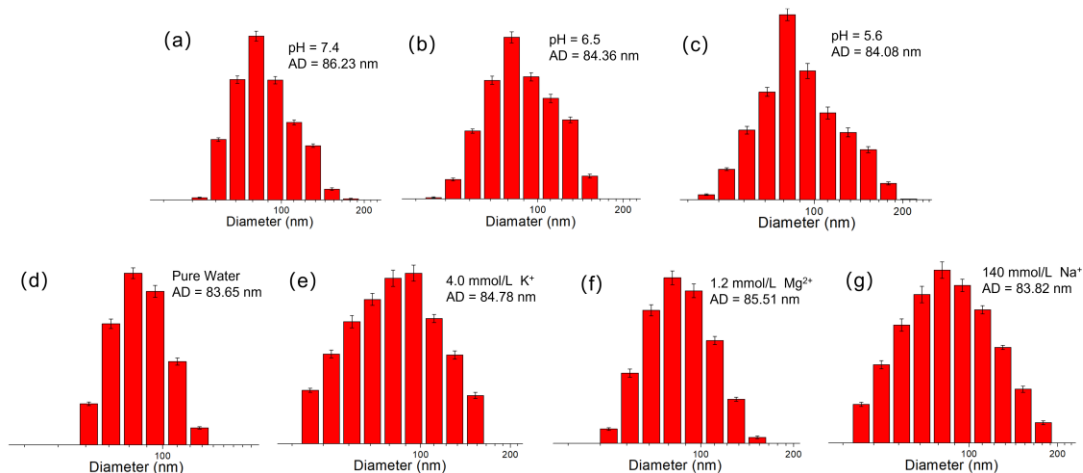

Figure S10. DLS studies of [3]WP5PR-based nanoparticles under different conditions.

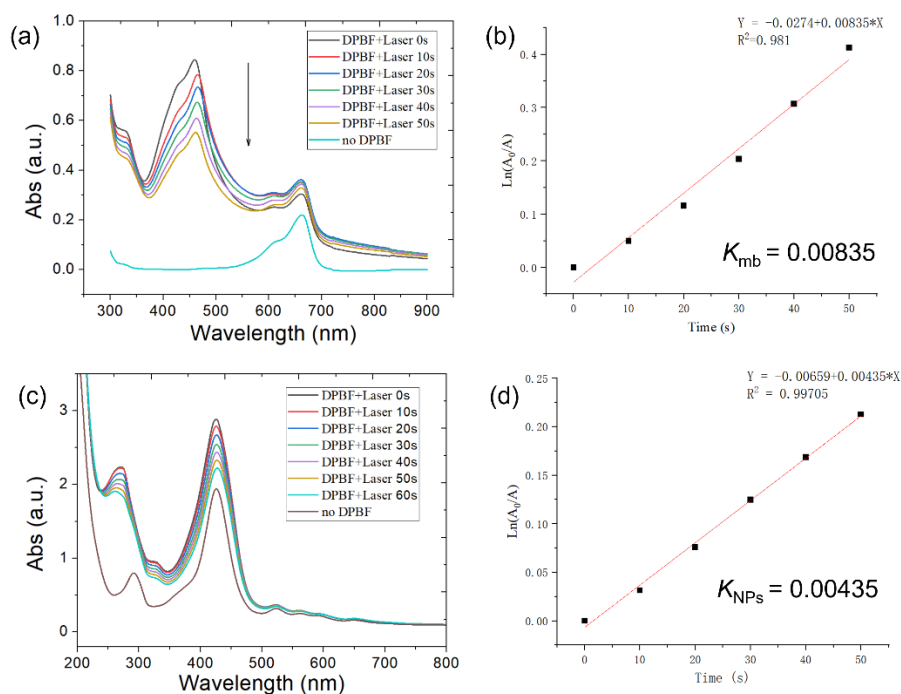

Figure S11. Time-dependent UV-vis spectra of (a) MB with DPBF after irradiation, (b) [3]WP5PR with DPBF after irradiation.

$\Phi_{NPs} = \Phi_{mb} * (K_{NPs}/K_{mb}) * (A_{mb}/A_{NPs})$ , A is the absorbance at 660nm.

So,  $\Phi_{NPs} = 0.751\Phi_{mb}$ .

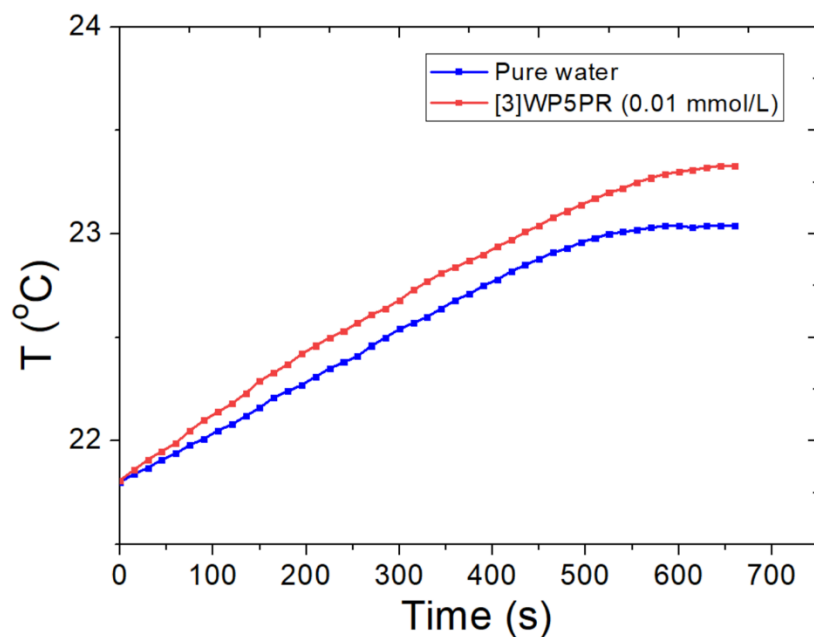

Figure S12. Temperature increase of pure water and **[3]WP5PR** solution (0.01 mM) with 660 nm laser irradiation (1 mW/cm<sup>2</sup>).

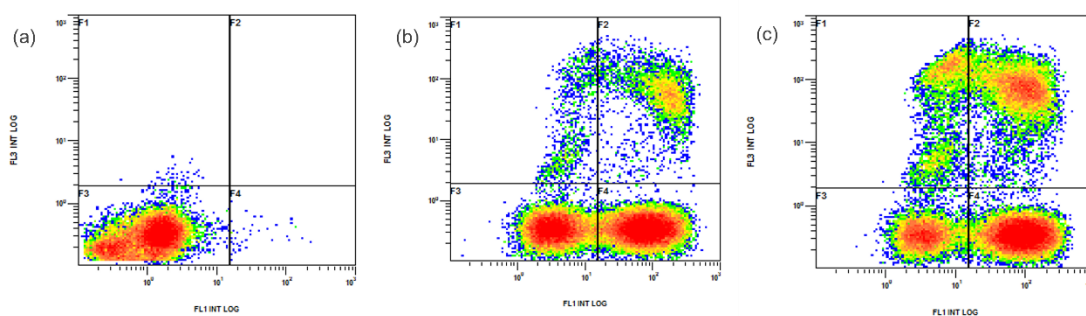

Figure S13. Flow cytometry experiments of (a) **[3]WP5PR**, (b) **pPor + Laser**, and (c) **[3]WP5PR + Laser**. [C] = 70  $\mu$ M.

## References

- S1. Yang Wang, Chenwei Wang, Renhua Long, Yufeng Cao, Dongli Fan, Moupan Cen, Leyu Cao, Yanmei Chen, Yong Yao, *Chem. Commun.*, **2019**, 55, 5167-5170
- S2. Tomoki Ogoshi, Masayoshi Hashizume, Tada-aki Yamagishi and Yoshiaki Nakamoto, *Chem. Commun.*, **2010**, 46, 3708-3710.
